# Supplementary material for: The role of surface Zn2+ ions in the transesterification of vegetable oils over ZnO supported on Al2O3 and Fe2O3
Source: Royal Society of Chemistry journal article supplement (doi:10.1039/c3cy00857f), 2013-12-03

### SUPPLEMENTARY INFORMATION:

Figure S1. Arrhenius plots for the transesterification reactions on the catalysts (A)  $\text{ZnAl}_2\text{O}_4$  and (B)  $\text{ZnFe}_2\text{O}_4$ .

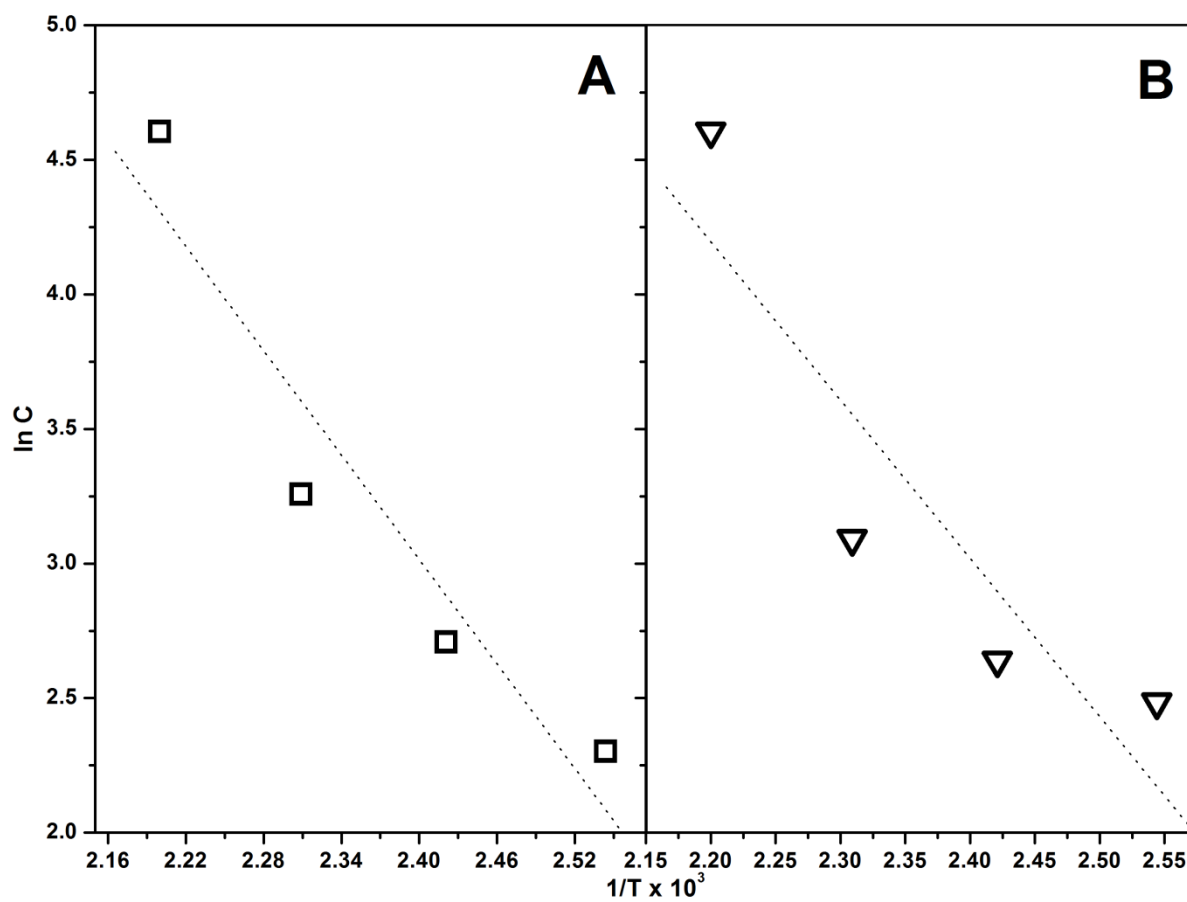

Supplement: c3cy00857f.pdf [file c3cy00857f.pdf]
